# Supplementary material
Source: PubMed Central journal article supplement (PMC1783801)
Supplement: JCI0729709sd.pdf [file JCI0729709sd.pdf]

**A**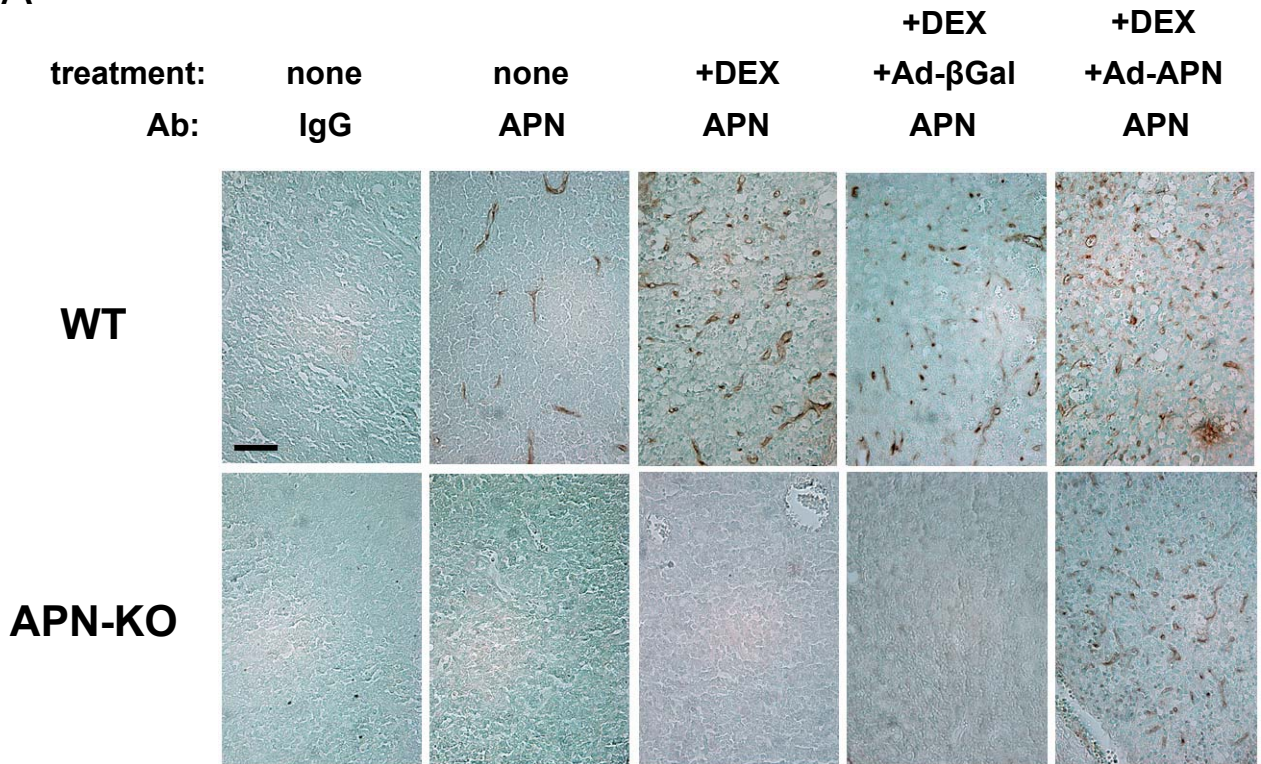**B**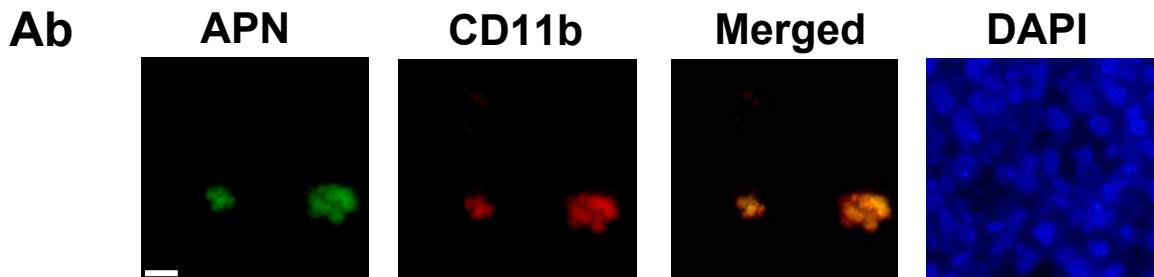

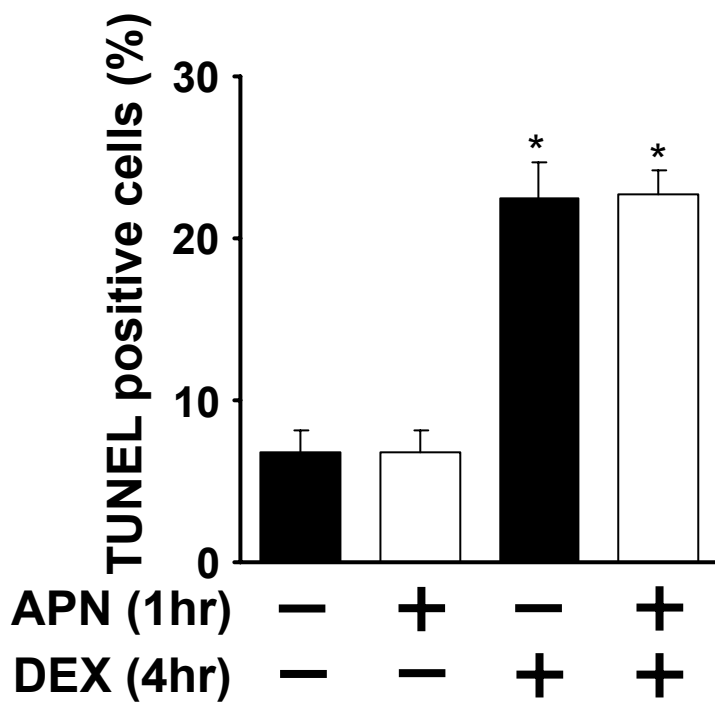

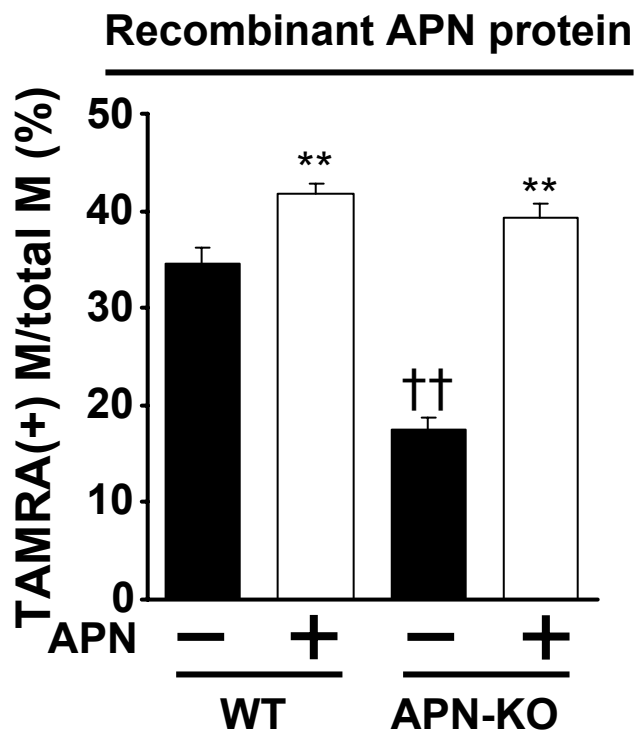

A

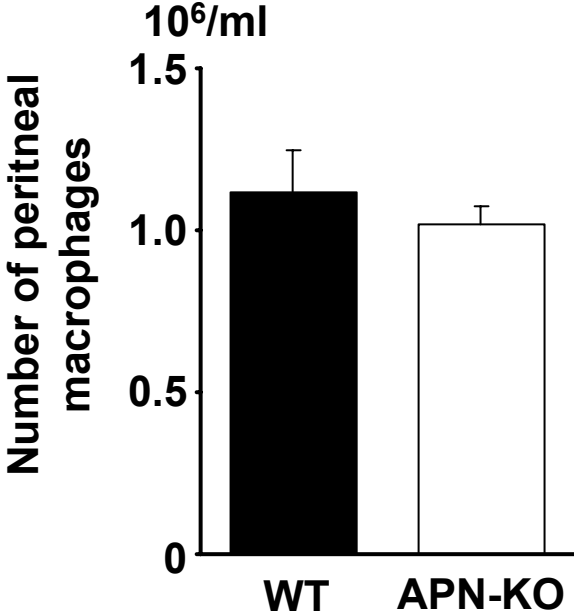

B

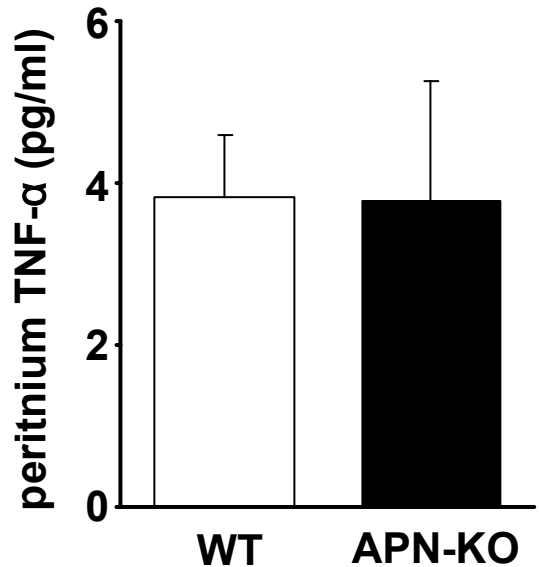

A

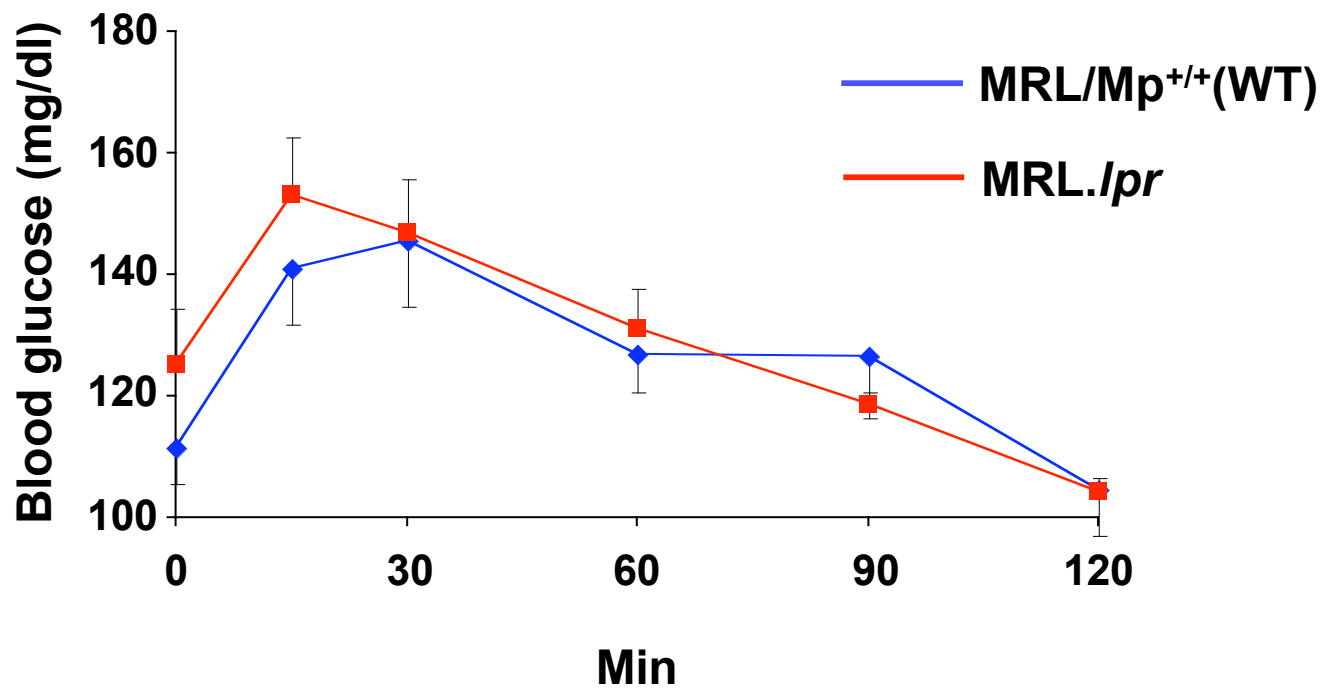

B

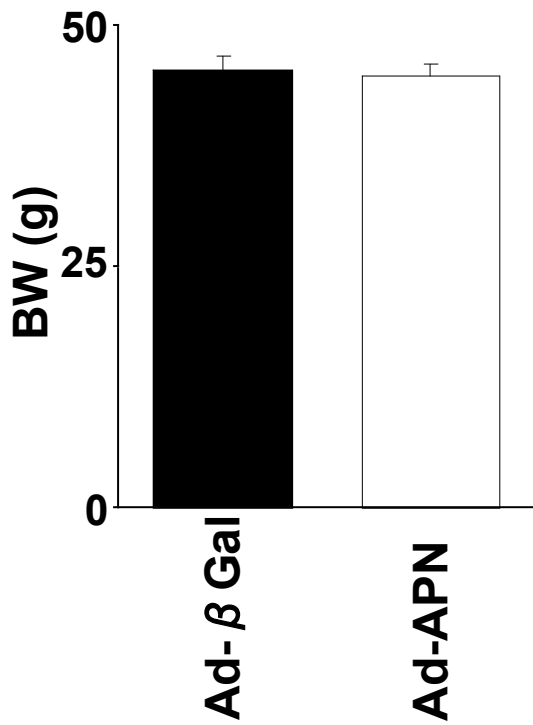

C

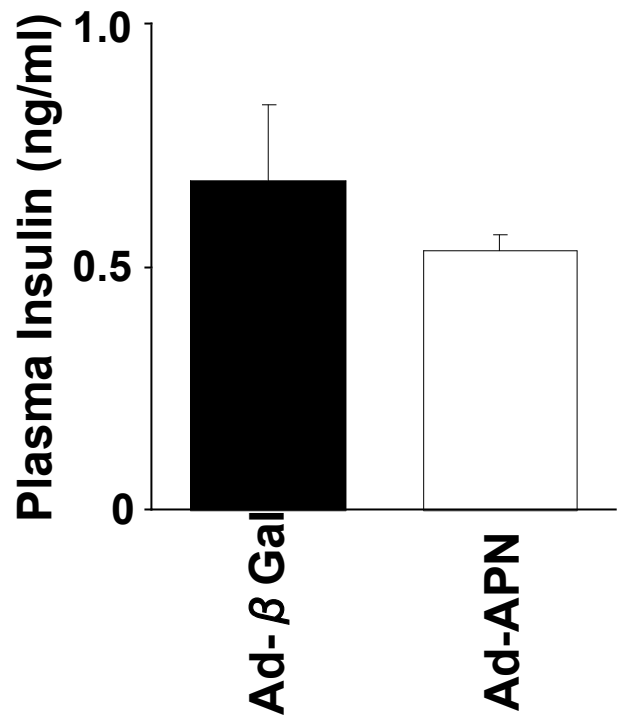

D

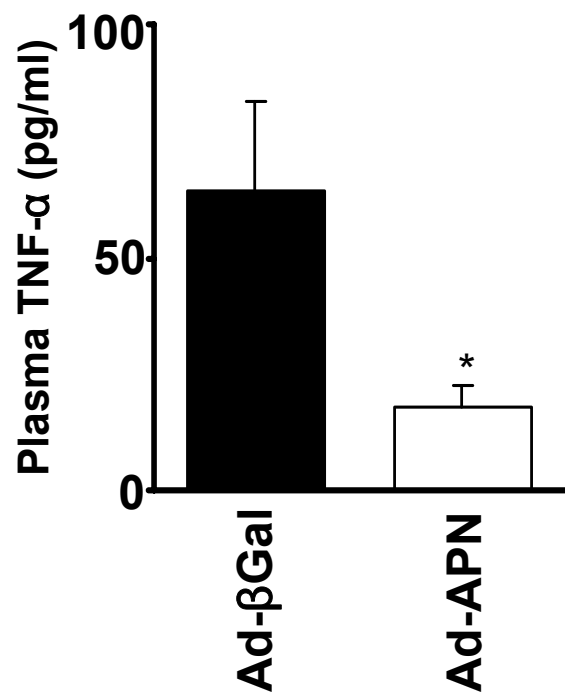

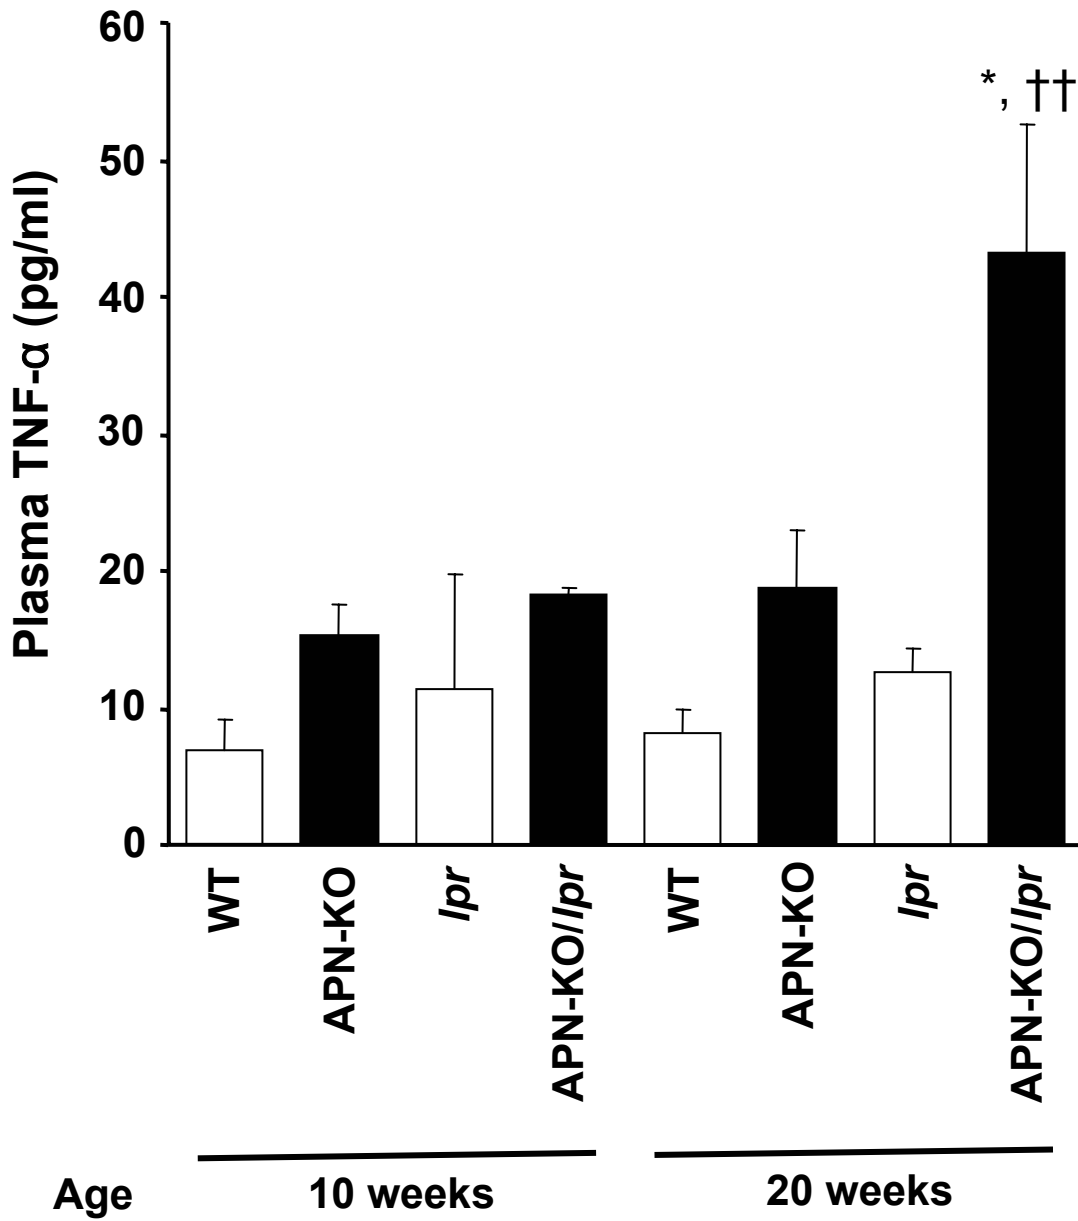

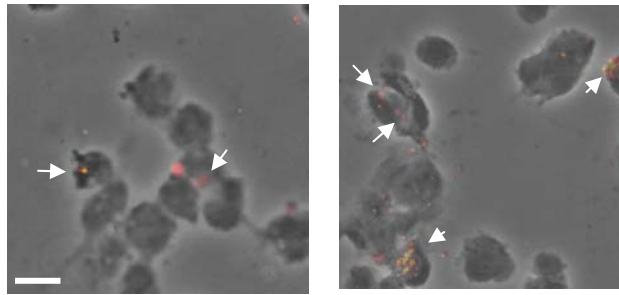

**Vehicle**

**APN**

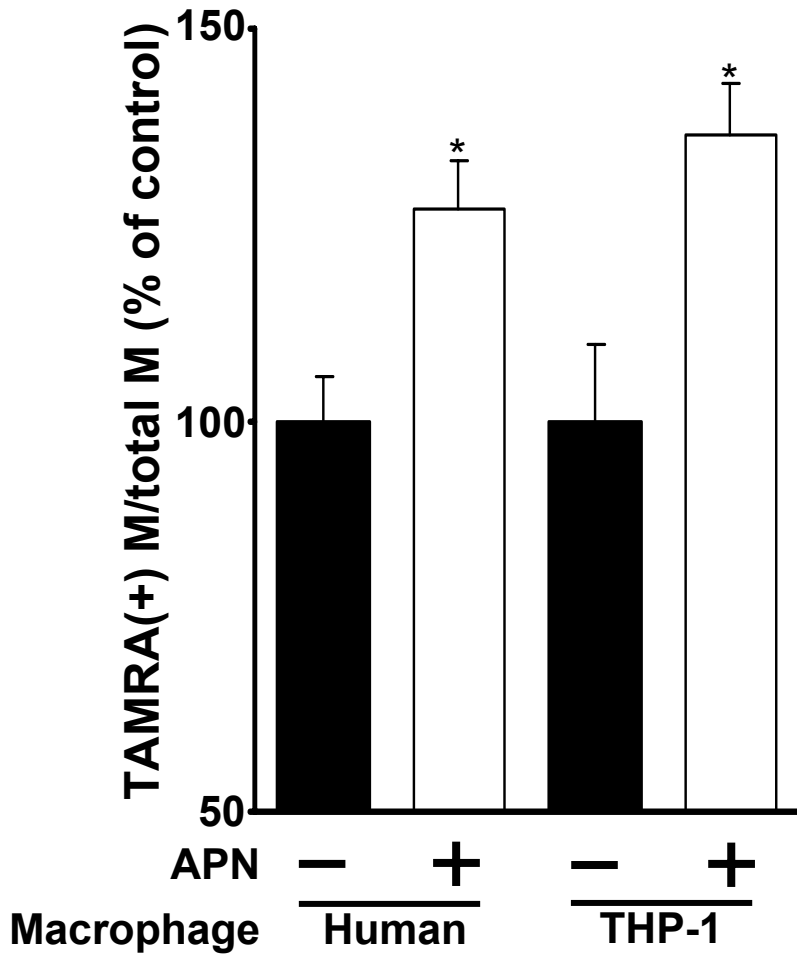



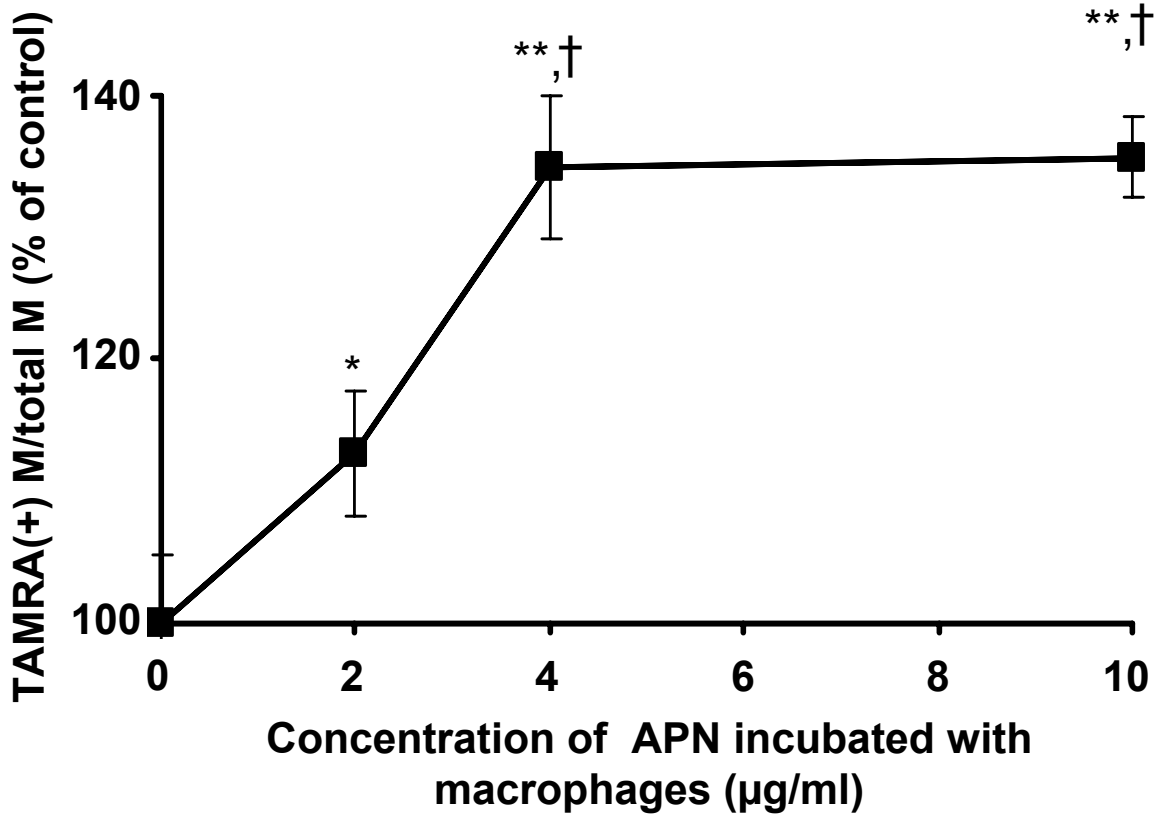

A

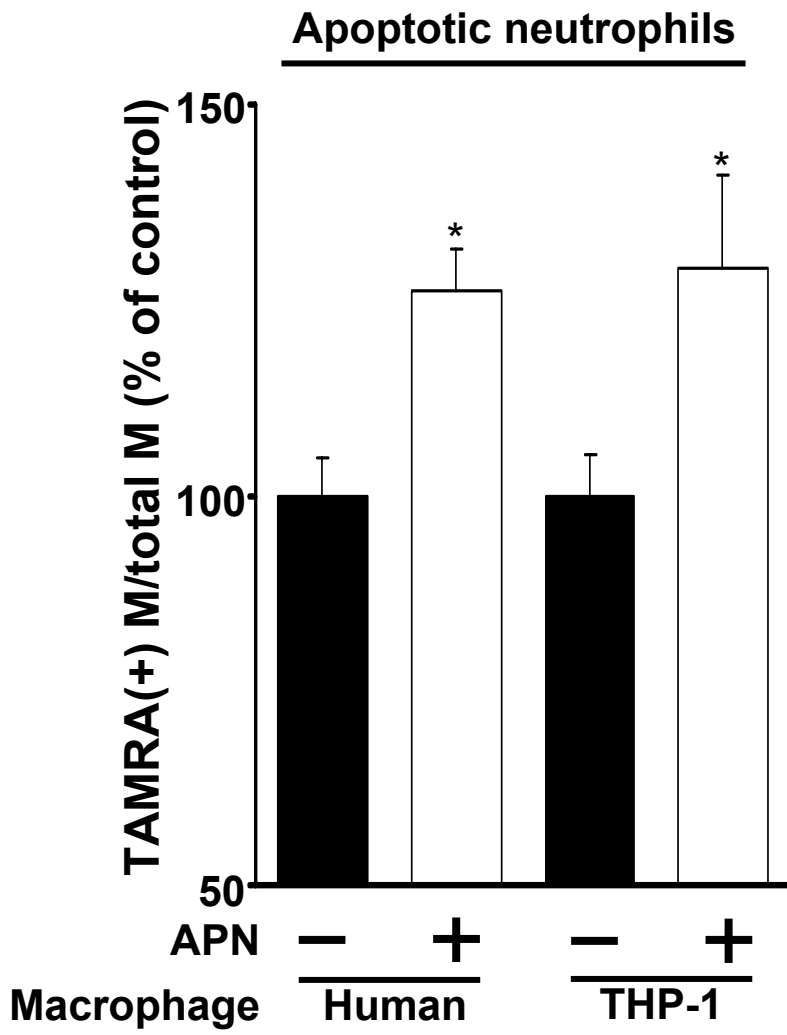

B

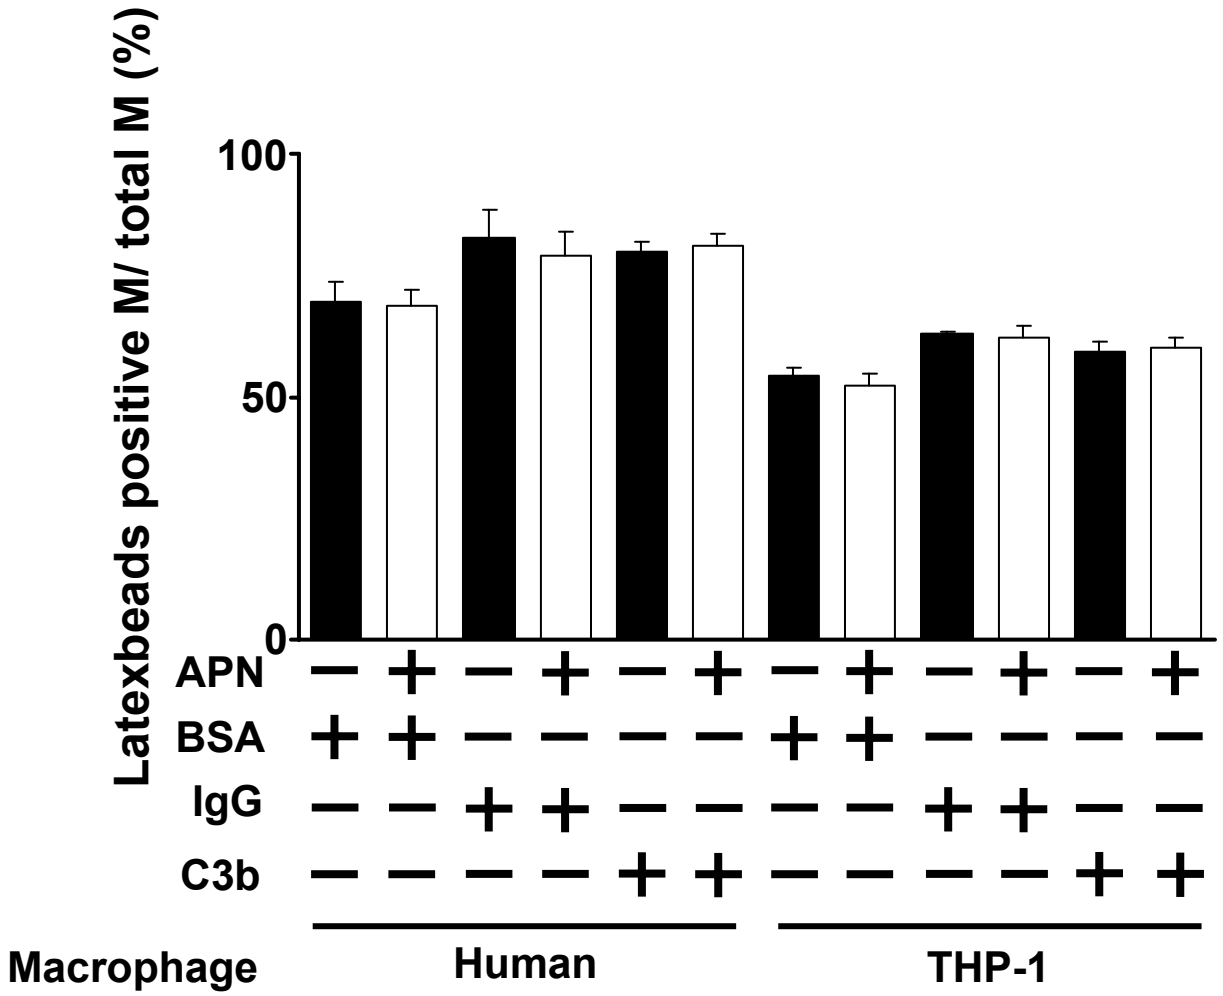

C

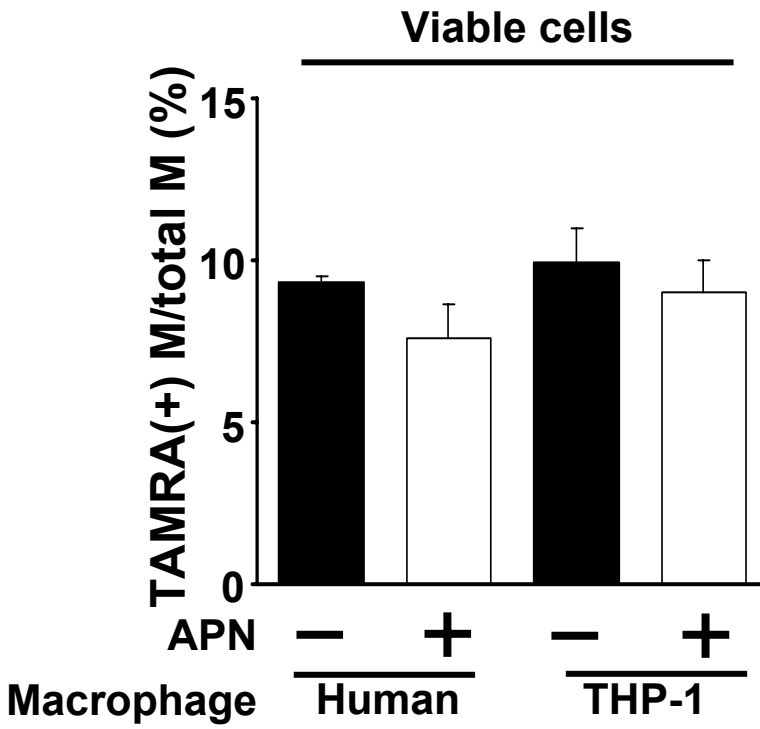

D

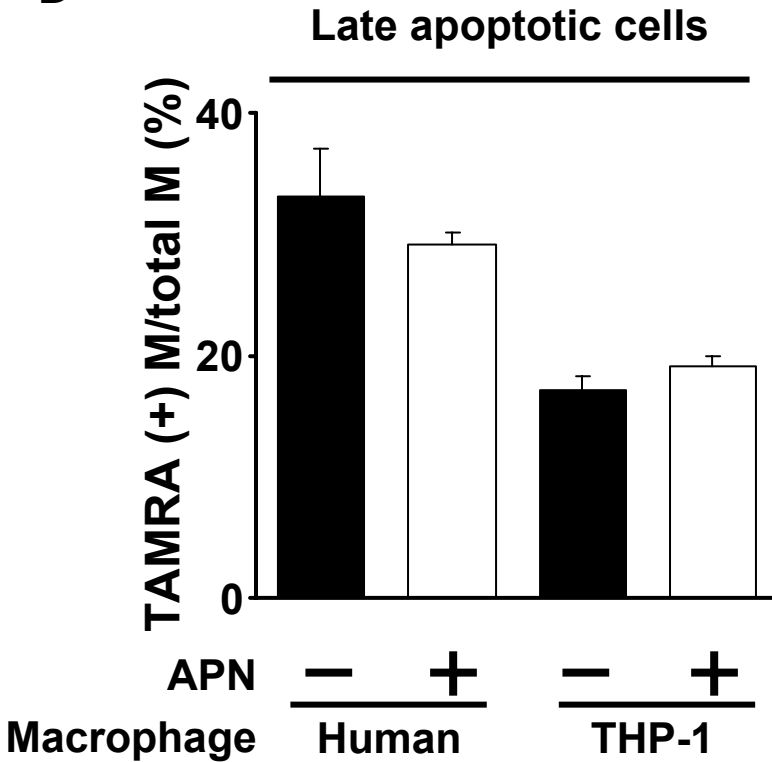

A

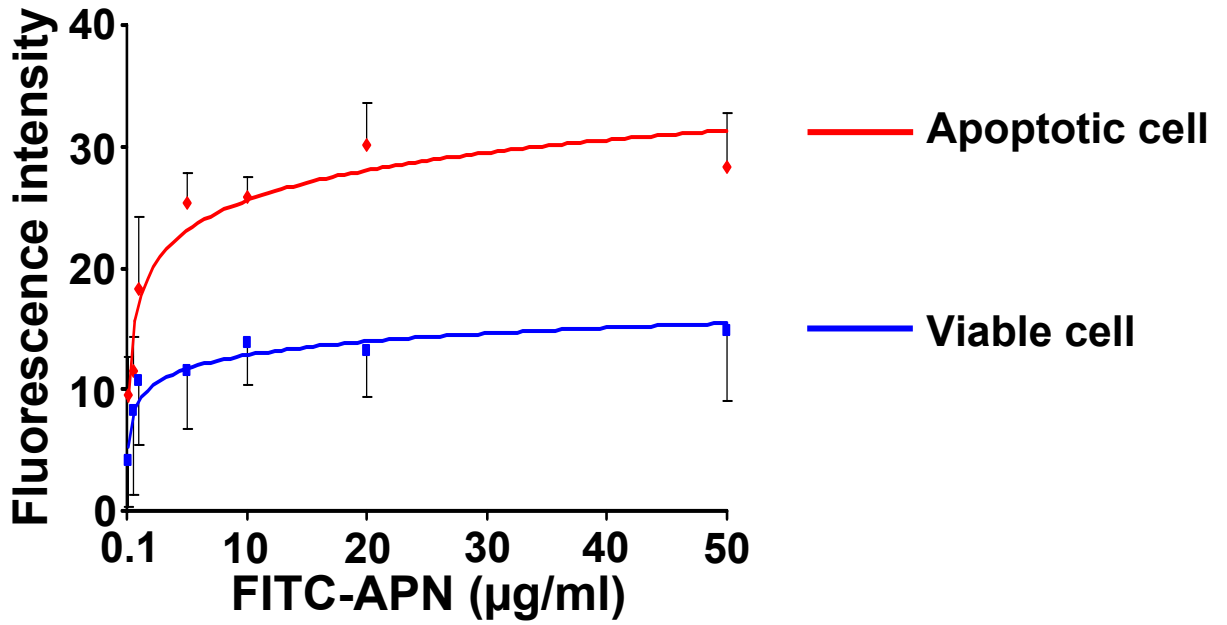

B

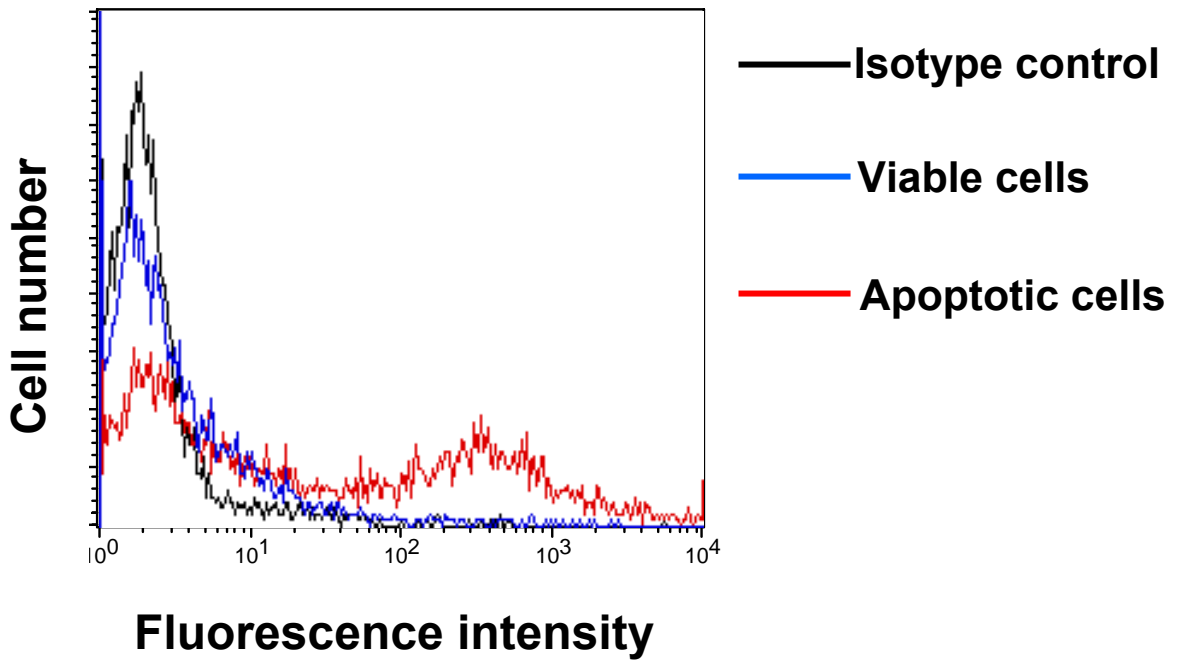

C

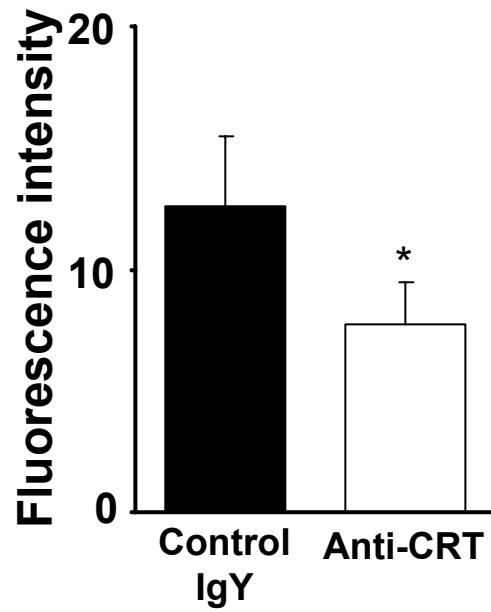

D

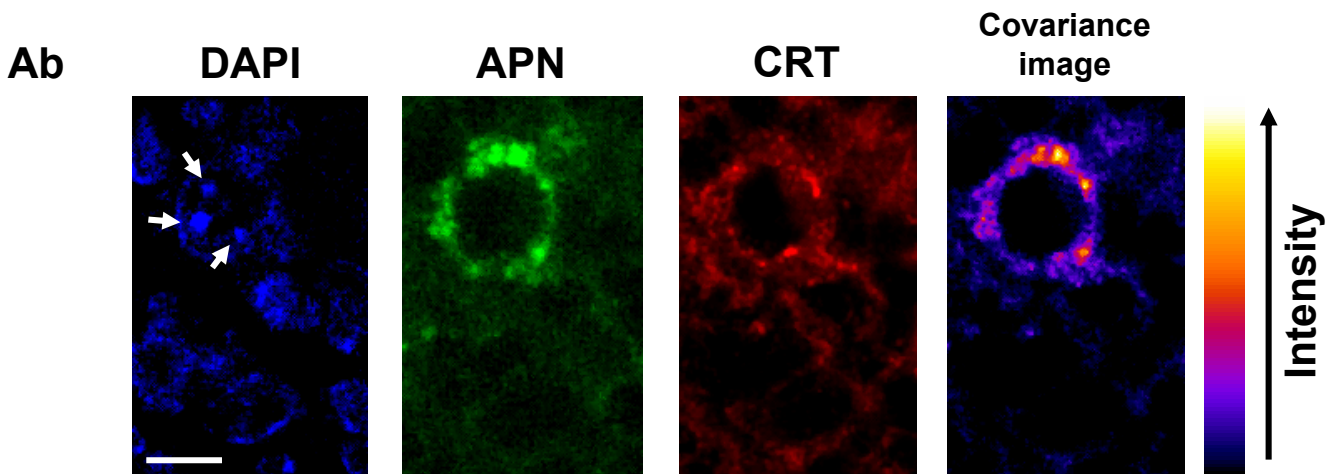

A

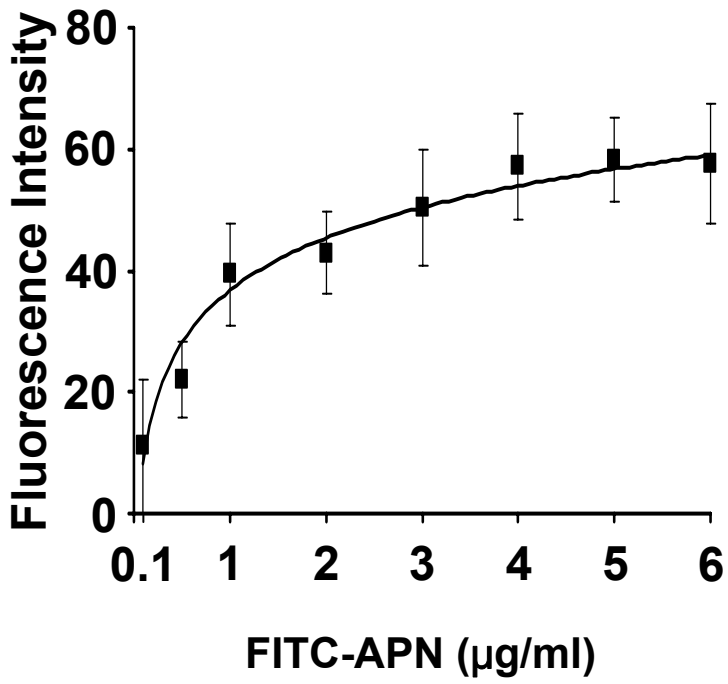

B

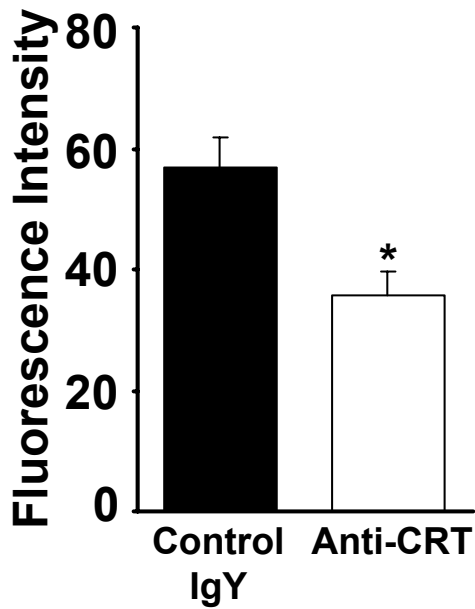

C

Ab

APN

CRT

Merged

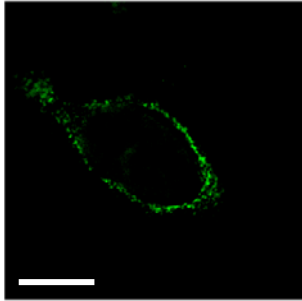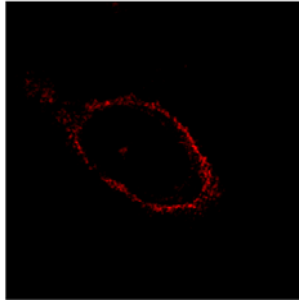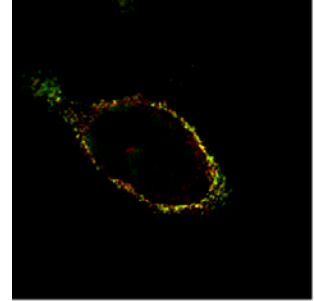



**Calreticulin**

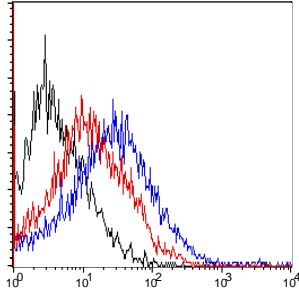

**CD91**

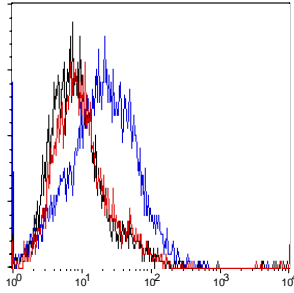

**AdipoR1**

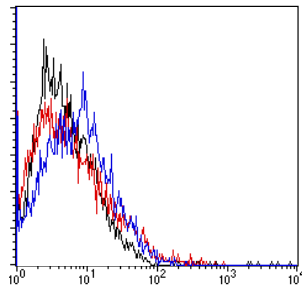

**AdipoR2**

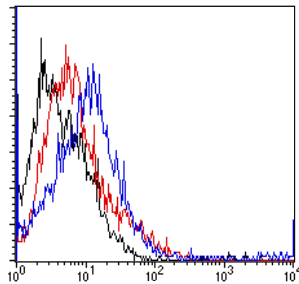

**T-Cadherin**

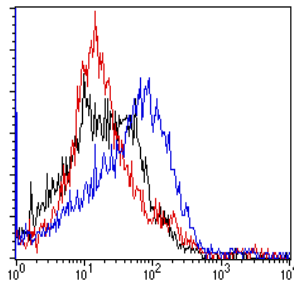

— Isotype control

— Unrelated RNA

— Test siRNA

## Supplemental Figure Legends

**Supplemental Figure 1. Adiponectin accumulates in damaged thymi and colocalizes with macrophages.** (A) Immunohistochemical analysis of thymi of wild-type and APN-KO mice. The adiponectin signal increased in the thymus of wild-type mice following injury with dexamethasone. Control IgG consistently showed no evidence of staining. Thymi sections from APN-KO mice showed no staining with adiponectin antibody, except in the case of Ad-APN treated animals. Bar = 50  $\mu\text{m}$ . (B) Adiponectin colocalized macrophages in mouse thymi. The thymi of wild-type mice treated with DEX followed by Ad-APN treatment were used. Sections were stained with anti-mouse adiponectin antibody (green) and anti-mouse CD11b antibody (red). Colocalization is indicated by yellow in the merged image. Bar = 10  $\mu\text{m}$ .

**Supplemental Figure 2. Recombinant adiponectin does not protect thymocytes from apoptosis induced by dexamethasone in vitro.** Thymocytes were collected from wild type mice and were preincubated with human recombinant adiponectin (50  $\mu\text{g/ml}$ ) for 1 hr prior to stimulation of DEX (1  $\mu\text{M}$ ) or vehicle for 4 hr. TUNEL-positive (apoptotic) thymocytes were assessed by fluorescent microscopic analysis. \*  $P < 0.05$  versus control ( $n = 3-6$ ).

**Supplemental Figure 3. Local administration of human recombinant adiponectin protein increases uptake of apoptotic cells by macrophages in vivo.** TAMRA, SE-labeled early apoptotic Jurkat T cells were preincubated for 1 hr with baculovirus-produced APN (50  $\mu\text{g/ml}$ ) or vehicle prior to injection into the peritoneal cavity. After 30 min, macrophage phagocytosis was assessed by flow cytometry. Macrophages were stained with FITC-conjugated anti-F4/80 antibody and the percentage of phagocytic macrophages (M) was calculated as TAMRA, SE-positive (+) macrophages (M)/total M X 100%. \*\* $P < 0.01$  versus vehicle ( $n = 6$ ).

**Supplemental Figure 4. Peritoneal macrophages and TNF- $\alpha$  levels induced by thioglycollate injection are similar in APN-KO and WT mice.** (A) Peritoneal macrophages were collected with 5 ml of lavage fluid 3 days after thioglycollate injection

into abdominal cavity. Collected macrophages were stained with Diff Quik are counted by microscopy. **(B)** TNF- $\alpha$  levels in lavage supernatant from abdominal cavity was determined by ELISA ( $n = 3-4$ ).

**Supplemental Figure 5. Systemic delivery of adiponectin reduces plasma TNF- $\alpha$  levels in MRL.*lpr* mice without influencing metabolic parameters.** **(A)** MRL.*lpr* had normal glucose sensitivity at the age of 18 weeks. Glucose tolerance tests were performed on MRL/Mp<sup>+/+</sup> (WT) and MRL.*lpr* mice after 6 h fasting. After peritoneal injection of 1g/kg glucose, blood samples were collected and assayed for blood glucose. ( $n = 5-7$ ). **(B)** Body weight (BW) was not different after 2 weeks in MRL.*lpr* administered Ad- $\beta$ gal or Ad-APN ( $n = 8$ ). **(C)** Circulating insulin levels were not different in MRL.*lpr* administered Ad- $\beta$ gal or Ad-APN. Blood samples were collected after 6 h fasting ( $n = 3-4$ ). **(D)** Administration of Ad-APN significantly reduced plasma TNF- $\alpha$  levels in MRL.*lpr* mice. TNF- $\alpha$  levels were measured 2 weeks after injection of Ad-APN or Ad- $\beta$ gal. \* $P < 0.05$  versus Ad- $\beta$ gal ( $n = 8$ ).

**Supplemental Figure 6. Adiponectin-deficient B6.*lpr* mice display increased plasma TNF- $\alpha$  levels.** Blood samples of each type of mice were collected at the age of 10 weeks and 20 weeks. \* $P < 0.05$  versus APN-KO; †† $P < 0.01$  versus WT and *lpr* ( $n = 4-13$ ).

**Supplemental Figure 7. Adiponectin promotes the phagocytosis of apoptotic cells by microscopic analysis.** TAMRA, SE-labeled apoptotic Jurkat T cells were preincubated for 1 hr with baculovirus-produced adiponectin from (50  $\mu$ g/ml) or vehicle. Human monocyte-derived macrophages or differentiated THP-1 cells were then incubated for 30 min with the labeled Jurkat cells under conditions where the concentration of APN was diluted to 10  $\mu$ g/ml. Phagocytosis was assessed by microscopy, and representative pictures for 2 experimental conditions using THP-1 macrophages are shown. White arrows indicate ingested TAMRA, SE-positive apoptotic Jurkat T cells. Bar =20  $\mu$ m. The percentage of phagocytic macrophages was calculated as TAMRA, SE-positive (+) macrophages (M)/total M X 100%. Control is 20.4  $\pm$  1.1% (human) and 15.5  $\pm$  1.5% (THP-1). \* $P < 0.05$  versus vehicle ( $n = 8$ ).

**Supplemental Figure 8. Adiponectin promotes the phagocytosis of apoptotic bodies in a dose-dependent and saturable manner.** TAMRA, SE-labeled apoptotic Jurkat T cells were preincubated for 1 hr with baculovirus-produced adiponectin (10, 20 or 50  $\mu\text{g/ml}$ ) or vehicle. Human monocyte-derived macrophages were then incubated for 30 min with TAMRA, SE-labeled Jurkat T cells, under conditions where the concentration of APN was diluted to 2, 4 or 10  $\mu\text{g/ml}$ . Phagocytosis was assessed by flow cytometry. Macrophages were stained with FITC-conjugated anti-human macrophage antibody and the percentage of phagocytic macrophages was calculated as TAMRA, SE-positive (+) macrophages (M)/total M X 100%. The percentage of phagocytic macrophages in the absence of adiponectin is  $34.3 \pm 1.8\%$ . \* $P < 0.05$ , \*\* $P < 0.01$  versus vehicle, † $P < 0.05$  versus 2  $\mu\text{g/ml}$  ( $n = 9-10$ ).

**Supplemental Figure 9. Adiponectin promotes the phagocytosis of apoptotic neutrophils but not IgG-, C3b-opsonized microbeads, viable cells or late apoptotic cells. (A)** Recombinant adiponectin increases uptake of apoptotic human neutrophils. TAMRA, SE-labeled apoptotic neutrophils are preincubated for 1 hr with baculovirus-produced adiponectin (50  $\mu\text{g/ml}$ ) or vehicle. Human monocyte-derived macrophages and THP-1 cells were then incubated for 30 min with TAMRA, SE-labeled neutrophils under conditions where adiponectin was diluted to 10  $\mu\text{g/ml}$ . Phagocytosis was assessed by microscopy. The percentage of phagocytic macrophages was calculated as TAMRA, SE-positive (+) macrophages (M)/total M X 100%. Phagocytic macrophage of control is  $21.1 \pm 0.9\%$  (human) and  $18.5 \pm 1.0\%$  (THP-1) \* $P < 0.05$  versus vehicle ( $n = 8$ ). **(B)** Recombinant adiponectin did not increase the uptake of opsonized latex microbeads. 1.0  $\mu\text{m}$  red fluorescent (580/605) FluoSpheres<sup>®</sup> carboxylate-modified microspheres (Invitrogen) were opsonized with BSA, human IgG or human C3b. Each opsonized fluorescent microbeads ( $1 \times 10^7$  beads) were treated with baculovirus-produced adiponectin and exposed to macrophages as described above. Phagocytosis was assessed by flow cytometry as described above ( $n = 4$ ). **(C)** Recombinant adiponectin did not increase the uptake of viable Jurkat T cells. TAMRA, SE-labeled viable Jurkat T cells were preincubated for 1 hr with recombinant adiponectin or vehicle, and exposed to human monocyte-derived macrophages or THP-1 cells as described above. Phagocytosis

was assessed by flow cytometry ( $n = 4$ ). **(D)** Recombinant adiponectin did not increase the uptake of late apoptotic Jurkat T cells. TAMRA, SE-labeled late apoptotic Jurkat T cells were preincubated for 1 hr with recombinant adiponectin or vehicle and exposed to human monocyte-derived macrophages or THP-1 cells as described above. Late apoptotic cells stained positive with propidium iodide, but early apoptotic cells did not.

Phagocytosis was assessed by flow cytometry ( $n = 3-6$ ).

**Supplemental Figure 10. Adiponectin binding to viable and apoptotic cells. (A)**

Saturable binding of recombinant adiponectin to early apoptotic and viable Jurkat T cells. Apoptotic and viable Jurkat T cells were incubated with increasing concentrations of FITC-conjugated adiponectin and binding was assessed with a fluorescent microplate reader. The data were analyzed with Microsoft Excel to produce a logarithmic trend line.

**(B)** The expression of calreticulin is increased on the surface of apoptotic Jurkat T cells. Early apoptotic and viable Jurkat T cells were stained with anti-calreticulin antibody or isotype control followed by treatment with FITC-conjugated secondary antibody. The expression of cell surface calreticulin was analyzed by flow cytometry. Representative data are shown.

**(C)** Anti-calreticulin antibody inhibits the binding of adiponectin to apoptotic Jurkat T cells. Early apoptotic and viable Jurkat T cells were incubated with 10  $\mu\text{g}$  FITC-APN for 60 min in the presence of anti-calreticulin antibody (200  $\mu\text{g}/\text{ml}$ ) or control chicken IgY (200  $\mu\text{g}/\text{ml}$ ) for 60 min. Fluorescence intensity was measured with a microplate reader and corrected by substrating the fluorescence intensity of viable cells.

\* $P < 0.05$  versus control IgY ( $n=8$ ). **(D)** Adiponectin colocalizes with calreticulin on apoptotic thymocytes using two-photon confocal microscopy. Thymus sections were stained with anti-mouse adiponectin antibody (green), anti-calreticulin antibody (red) and DAPI (blue). White arrows show nuclear fragmentation in the apoptotic cell. The covariance image shows the relative degree of colocalization at each pixel. Bar = 5  $\mu\text{m}$ .

**Supplemental Figure 11. Adiponectin interacts with calreticulin on the macrophage cell surface. (A)**

Saturable binding of recombinant adiponectin to intact macrophages. THP-1 macrophages were incubated with increasing concentrations of FITC-conjugated

adiponectin, and binding was assessed with a fluorescent microplate reader. The data were analyzed with Microsoft Excel to produce a logarithmic trend line. **(B)** Anti-calreticulin antibody inhibits the binding of adiponectin to THP-1 macrophages. THP-1 macrophages were incubated with 6  $\mu\text{g}$  FITC-APN for 60 min in the presence of anti-calreticulin antibody (200  $\mu\text{g}/\text{ml}$ ) or control chicken IgY (200  $\mu\text{g}/\text{ml}$ ) for 60 min. Fluorescence intensity was measured with a microplate reader  $*P < 0.05$  ( $n = 8$ ). **(C)** Adiponectin and calreticulin are colocalized on the surface of macrophages. THP-1 macrophages were incubated with human recombinant adiponectin (5  $\mu\text{g}/\text{ml}$ ) for 60 min. After washing, THP-1 cells were stained with anti-human adiponectin antibody followed by Alexa Fluor<sup>®</sup> 488 conjugated anti-goat IgG antibody. Cells were then stained with anti-calreticulin antibody followed by Alexa Fluor<sup>®</sup> 594 conjugated anti-rabbit IgG antibody. The double labeled THP-1 cells were analyzed by confocal microscopy. Representative images are shown. Adiponectin is shown in green, calreticulin in red, and adiponectin colocalization with calreticulin is indicated by yellow. Bar = 10  $\mu\text{m}$ .

**Supplemental Figure 12. Adiponectin receptor downregulation by siRNA.**  $1 \times 10^6$  differentiated THP-1 macrophages were transfected for 24 hr with 200 nM siRNA using Lipofectamine 2000 reagent. Controls were transfected with unrelated siRNA. The reduction in cell surface proteins was measured using a flow cytometer 72 hr after transfection. Representative data are shown.
